# Supplementary material for: MALDI-TOF-MS based identification and molecular characterization of food associated methicillin-resistant Staphylococcus aureus
Source: PubMed Central journal article supplement (PMC5595867; doi:10.1038/s41598-017-11597-z), 2017-09-12
Supplement: 41598_2017_11597_MOESM1_ESM.pdf [file 41598_2017_11597_MOESM1_ESM.pdf]

1  
2  
3  
4  
5  
6  
7  
8  
9  
10  
11  
12  
13  
14  
15  
16  
17

**Supplementary Information**

**MALDI-TOF-MS based identification and molecular characterization  
of food associated methicillin-resistant *Staphylococcus aureus***

**Manukumar, H. M. and Umesha, S\*.**

*Department of Studies in Biotechnology, University of Mysore, Manasagangotri, Mysuru-  
570006, Karnataka, INDIA.*

**\*Corresponding author**

E-mail: [pmumesh@gmail.com](mailto:pmumesh@gmail.com), [su@appbot.uni-mysore.ac.in](mailto:su@appbot.uni-mysore.ac.in)

Phone: 91 0821 2419884; 09449264384

18

19

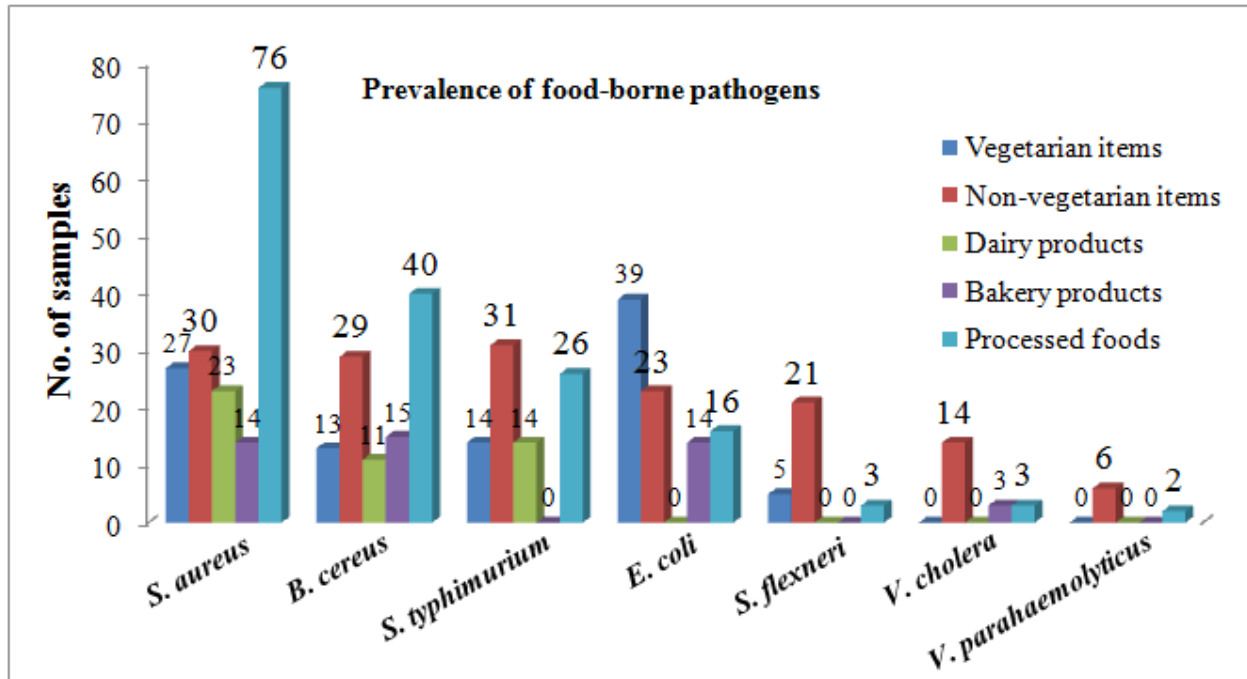

20

21 **Supplementary Fig S1. Different food samples and associated food-borne pathogens.**

22 Varieties food samples collected from different regions of Mysuru, India and isolated diverse  
23 pathogens from food samples associated.

24

25

26

27

28

29

30

31

32

33

34

35

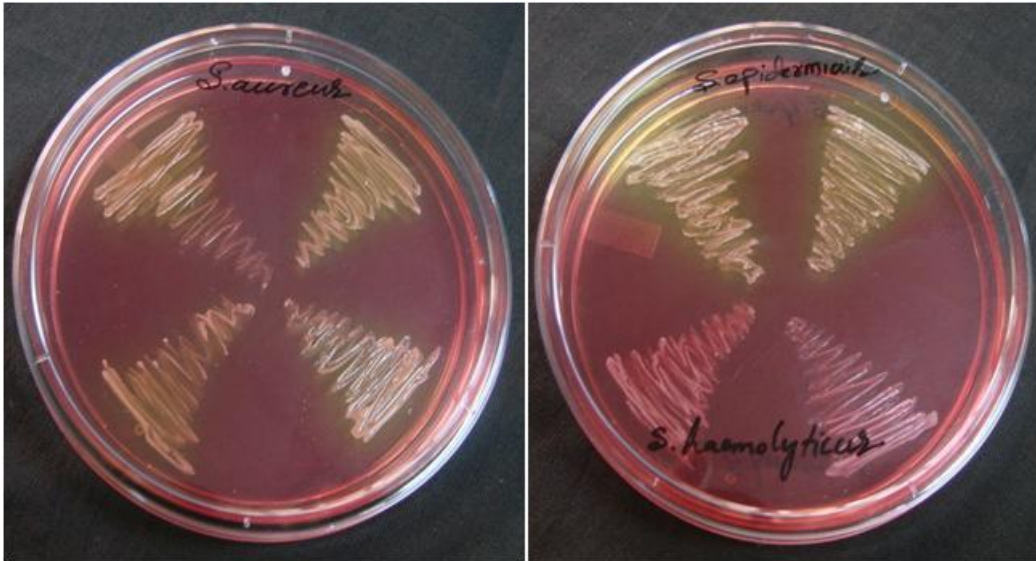

36 **A.**

37

38

39

40

41

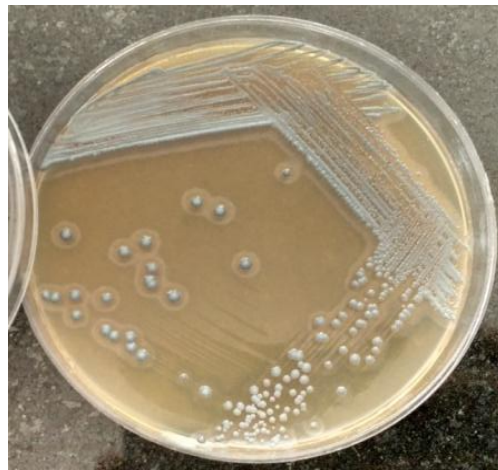

42 **B.**

43 **Supplementary Fig S2. Food-borne *Staphylococcal* spp. on selective medium. A.** This figure  
44 indicating the *S. aureus*, *S. epidermidis* and *S. haemolyticus* pathogens on selective Mannitol Salt  
45 Phenol-red Agar medium. **B.** Indicating the *S. aureus* on Baird Parker Agar medium

46 *E. coli*

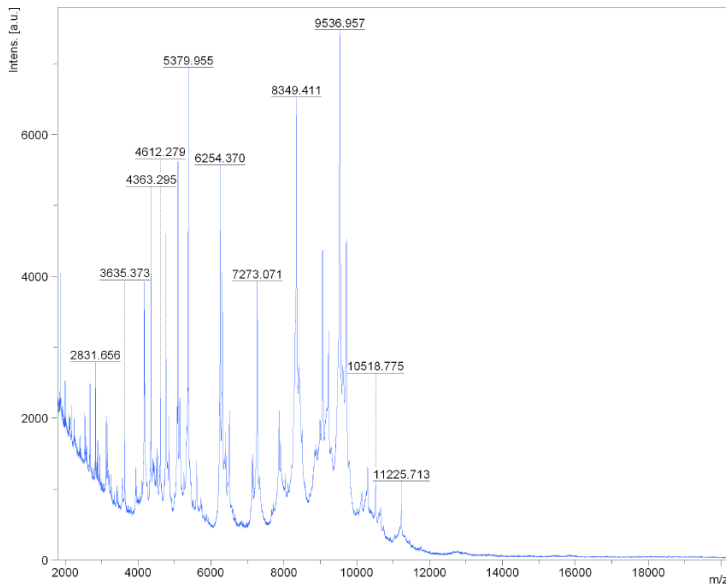

*B. cereus*

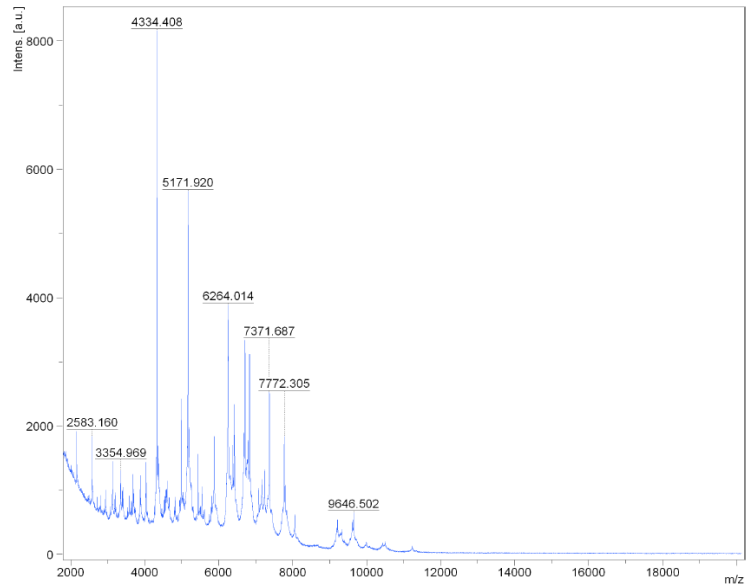

47

48 *S. typhimurium*

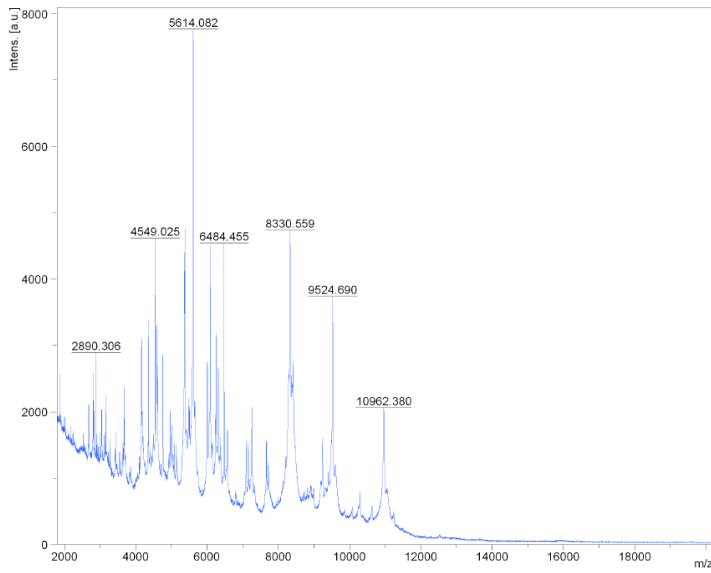

*S. flexneri*

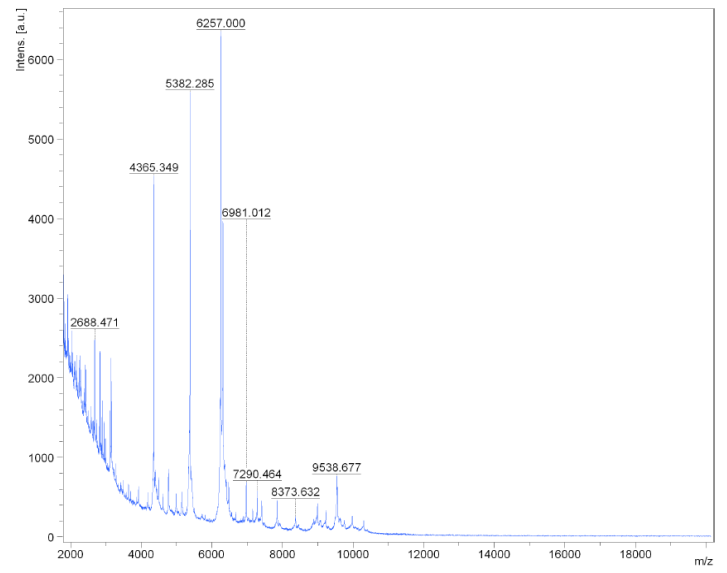

49 *P. aeruginosa*

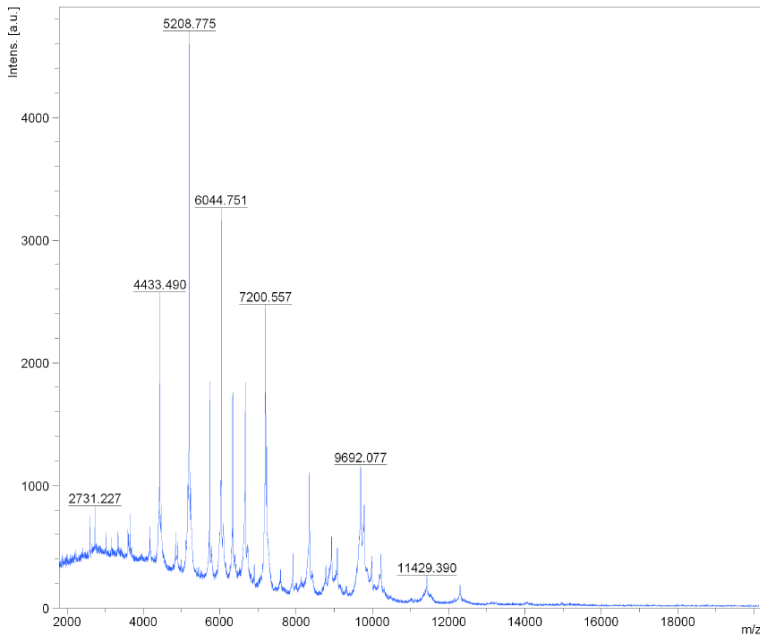

*V. cholera*

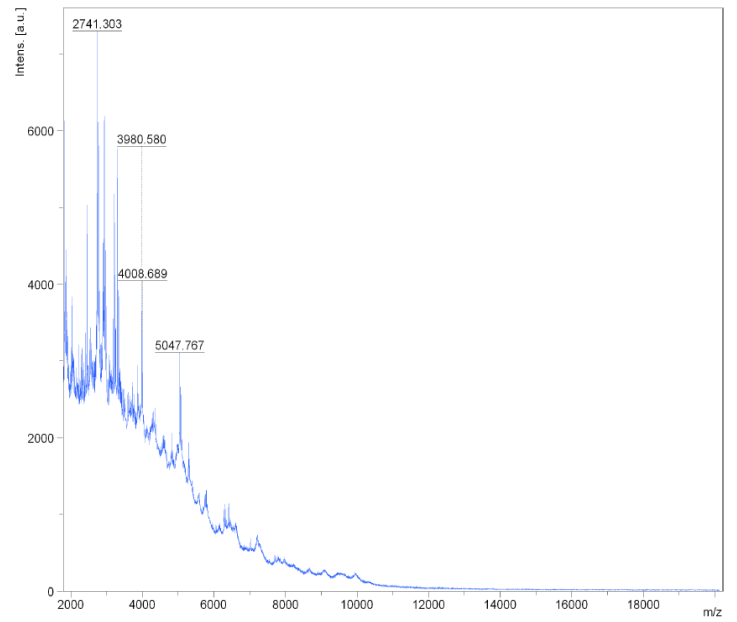

50

51 *V. parahaemolyticus*

*E. aerogenes*

52

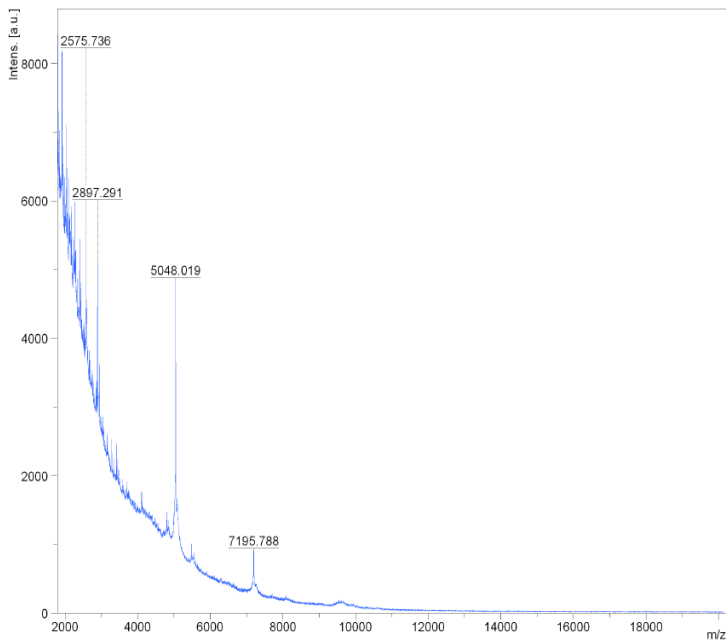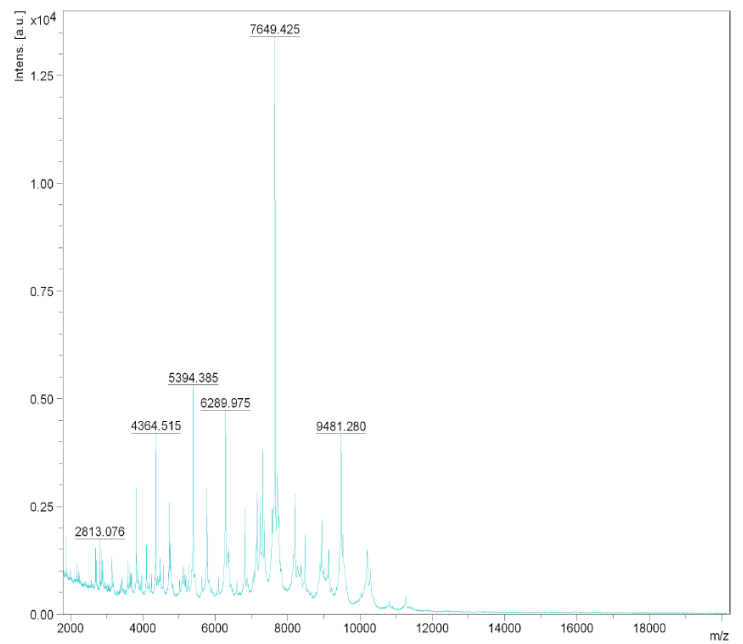

53 **Supplementary Fig S3.** Different food-borne pathogens MALDI-TOF-MS spectra.

54

55

56

57

58

59

60

61

62

63

64

65 **Supplementary Fig S4. Multi drug resistant (MDR) *Staphylococcal* isolates conserved *mecA***  
66 **gene.** All the *S. aureus* (1-5), *S. epidermidis* (6-8) and *S. haemolyticus* (9 and 10) amplified by  
67 *mecA* gene and amplified *mecA* gene product of 163 bp on agarose gel, along with 100 bp ladder  
68 (M) with negative control (C-).

69

70

71

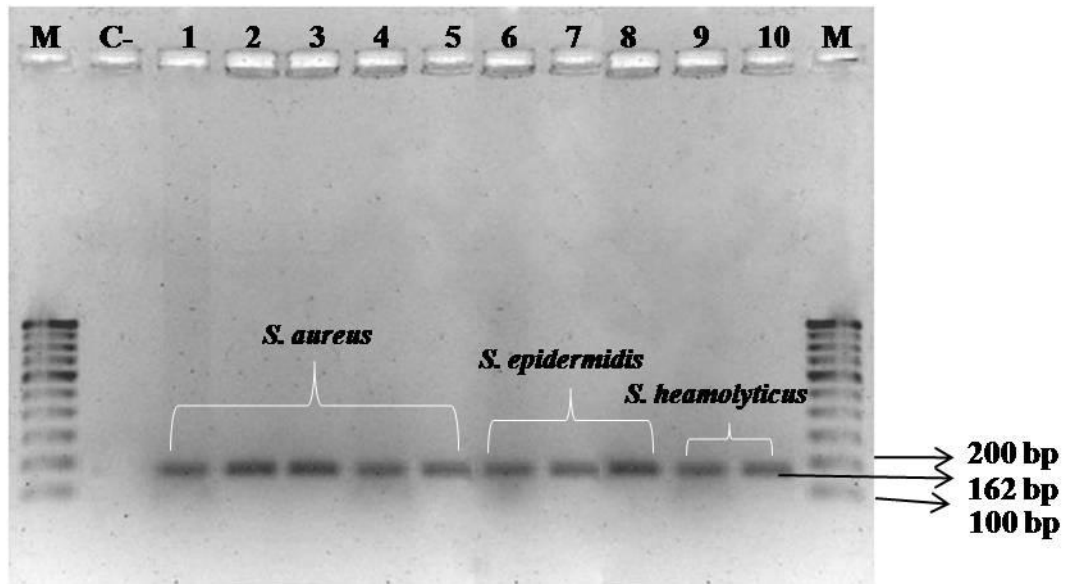

72

73

74

75

76

77

78

79

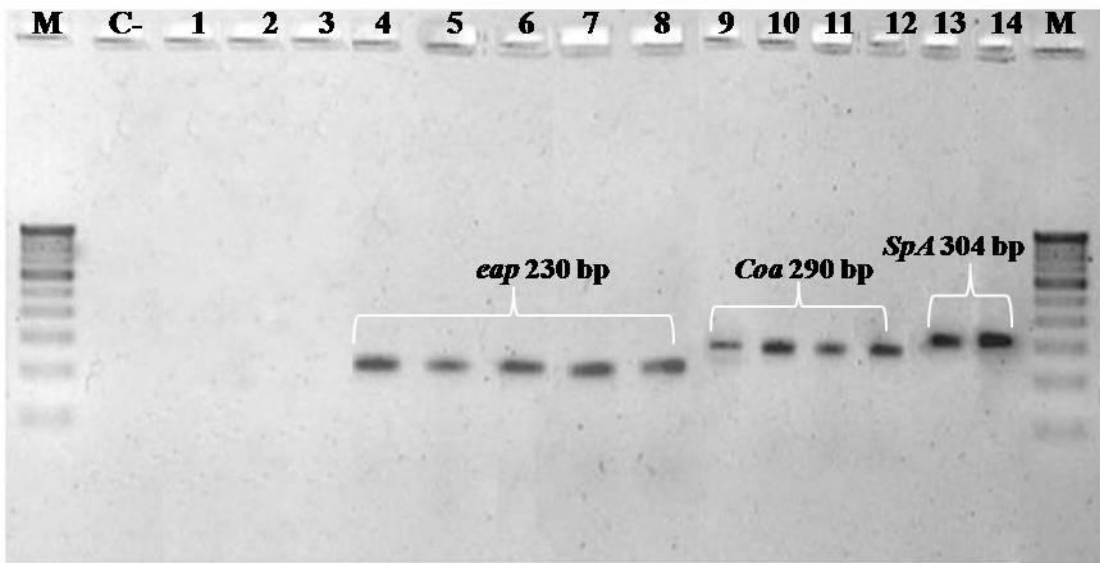

80 **Supplementary Fig S5.** The specific identification of *Staphylococcus aureus* was assessed by  
81 species specific primers *Eap* (Lane 4-8), *Coa* (Lane 9-12) and *SpA* (Lane 13&14) genes and  
82 amplified product confirmed 230, 290 and 304 bp size on agarose gel electrophoresis  
83 respectively. Lane 1-3 *E. coli*, *S. typhimurium*, and *S. flexneri* respectively; C- indicates negative  
84 control and Lane M represent 100 bp ladder.

85

86

87

88

89

90

91

92

93

94

95

96

97

98

99

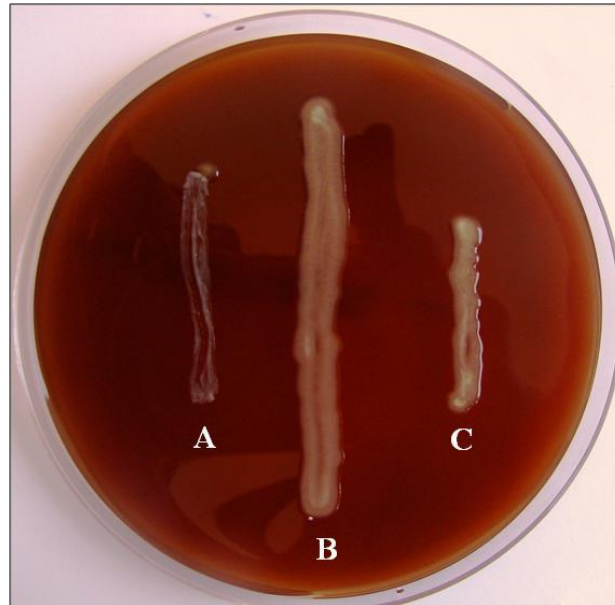

100 **Supplementary Fig S6. Hemolytic activity of *Staphylococcal* species.** Blood Agar medium  
101 exhibiting hemolytic activity: *S. haemolyticus* (A) showing  $\gamma$ -hemolytic, *S. epidermidis* (B) and  
102 *S. aureus* (C) shows  $\alpha$  -hemolytic property.

103

104

105

106

107



108

109

110

111

112

113

114

115

116

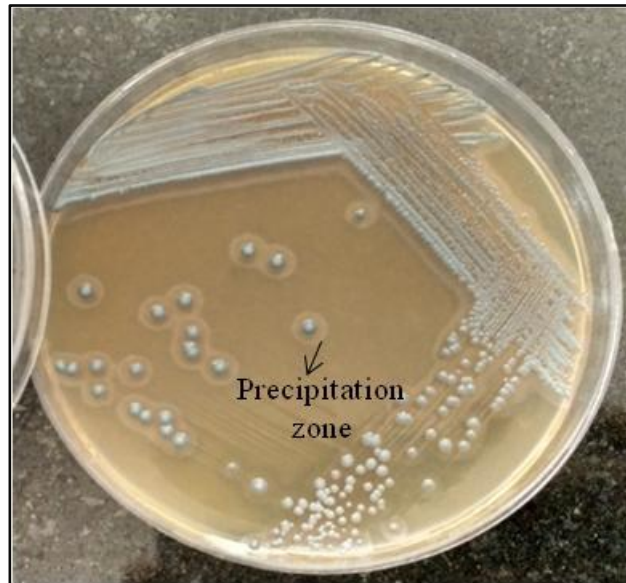

117

118 **Supplementary Fig S7.** Lecithinase activity of *Staphylococcus aureus* on BPA medium.

119

120

**Supplementary Table S1.** Different vegetarian samples, locations and specific pathogen isolation.

| Sl. No.      | Samples       | Location | Total No. of samples collected | Observations               |                  |                       |                |                    |                   |                           |
|--------------|---------------|----------|--------------------------------|----------------------------|------------------|-----------------------|----------------|--------------------|-------------------|---------------------------|
|              |               |          |                                | <i>Staphylococcal spp.</i> | <i>B. cereus</i> | <i>S. typhimurium</i> | <i>E. coli</i> | <i>S. flexneri</i> | <i>V. cholera</i> | <i>V. parahemolyticus</i> |
| 1            | Carrot        | A, B, E  | 16                             | 9                          | 1                | 0                     | 9              | 0                  | 0                 | 0                         |
| 2            | Beans         | A, B     | 8                              | 4                          | 0                | 0                     | 4              | 0                  | 0                 | 0                         |
| 3            | Capsicum      | A, E     | 2                              | 0                          | 1                | 2                     | 1              | 0                  | 0                 | 0                         |
| 4            | Cauliflower   | C        | 2                              | 1                          | 0                | 0                     | 1              | 0                  | 0                 | 0                         |
| 5            | Brinjal       | A, B, D  | 10                             | 2                          | 2                | 0                     | 5              | 0                  | 0                 | 0                         |
| 6            | Cabbage       | A, C, E  | 3                              | 1                          | 1                | 0                     | 1              | 0                  | 0                 | 0                         |
| 7            | Tomato        | A, B, C  | 15                             | 2                          | 2                | 0                     | 0              | 2                  | 0                 | 0                         |
| 8            | Radish        | A, D     | 3                              | 0                          | 0                | 0                     | 0              | 0                  | 0                 | 0                         |
| 9            | Ridge gourd   | A, D     | 4                              | 1                          | 0                | 0                     | 0              | 0                  | 0                 | 0                         |
| 10           | Bitter gourd  | A, B     | 5                              | 0                          | 0                | 0                     | 0              | 0                  | 0                 | 0                         |
| 11           | Cucumber      | A, E     | 3                              | 0                          | 0                | 0                     | 0              | 0                  | 0                 | 0                         |
| 12           | Chilli        | A, B, C  | 9                              | 1                          | 2                | 1                     | 2              | 0                  | 0                 | 0                         |
| 13           | Beet root     | A, E     | 3                              | 0                          | 0                | 0                     | 0              | 0                  | 0                 | 0                         |
| 14           | Ladies finger | A, B, D  | 4                              | 0                          | 0                | 1                     | 1              | 0                  | 0                 | 0                         |
| 15           | Onion         | A, B, C  | 13                             | 0                          | 1                | 0                     | 5              | 3                  | 0                 | 0                         |
| 16           | Potato        | B, C     | 8                              | 2                          | 1                | 0                     | 2              | 0                  | 0                 | 0                         |
| 17           | Amaranth      | A, C     | 2                              | 0                          | 0                | 0                     | 0              | 0                  | 0                 | 0                         |
| 18           | Apple         | A, C     | 7                              | 3                          | 1                | 0                     | 2              | 0                  | 0                 | 0                         |
| 19           | Pineapple     | B, C, E  | 3                              | 1                          | 0                | 0                     | 1              | 0                  | 0                 | 0                         |
| 20           | Banana        | A, B     | 4                              | 0                          | 0                | 0                     | 1              | 0                  | 0                 | 0                         |
| 21           | Grapes        | A, B     | 4                              | 0                          | 0                | 0                     | 1              | 0                  | 0                 | 0                         |
| 22           | Orange        | A, B     | 7                              | 0                          | 1                | 0                     | 2              | 0                  | 0                 | 0                         |
| 23           | Gooseberry    | C, E     | 2                              | 0                          | 0                | 0                     | 1              | 0                  | 0                 | 0                         |
| <b>Total</b> |               |          | <b>137</b>                     | <b>27</b>                  | <b>13</b>        | <b>4</b>              | <b>39</b>      | <b>5</b>           | <b>0</b>          | <b>0</b>                  |

**Supplementary Table S2.** Different Non-vegetarian samples, locations and specific pathogen isolation.

| Sl. No       | Samples | Location | No. of samples collected | Observation                |                  |                       |                |                     |                   |                           |
|--------------|---------|----------|--------------------------|----------------------------|------------------|-----------------------|----------------|---------------------|-------------------|---------------------------|
|              |         |          |                          | <i>Staphylococcal spp.</i> | <i>B. cereus</i> | <i>S. typhimurium</i> | <i>E. coli</i> | <i>S. flexineri</i> | <i>V. cholera</i> | <i>V. parahemolyticus</i> |
| 1            | Chicken | A,C, D   | 20                       | 6                          | 4                | 3                     | 5              | 2                   | 2                 | 1                         |
| 2            | Mutton  | A, B, C  | 15                       | 4                          | 8                | 2                     | 4              | 3                   | 3                 | 0                         |
| 3            | Fish    | A, D, E  | 14                       | 7                          | 5                | 4                     | 6              | 5                   | 1                 | 0                         |
| 4            | Crab    | D        | 4                        | 3                          | 4                | 6                     | 3              | 3                   | 5                 | 2                         |
| 5            | Prawn   | D        | 4                        | 2                          | 3                | 7                     | 2              | 3                   | 3                 | 1                         |
| 6            | Pork    | D, E     | 5                        | 3                          | 2                | 5                     | 2              | 4                   | 0                 | 2                         |
| 7            | Beef    | D        | 7                        | 5                          | 3                | 4                     | 1              | 1                   | 0                 | 0                         |
| <b>Total</b> |         |          | <b>69</b>                | <b>30</b>                  | <b>29</b>        | <b>31</b>             | <b>23</b>      | <b>21</b>           | <b>14</b>         | <b>6</b>                  |

**Supplementary Table S3.** Different dairy samples, locations and specific pathogen isolation.

| Sl. No       | Samples   | Location  | No. of samples collected | Observation                |                  |                       |                |                     |                   |                           |
|--------------|-----------|-----------|--------------------------|----------------------------|------------------|-----------------------|----------------|---------------------|-------------------|---------------------------|
|              |           |           |                          | <i>Staphylococcal spp.</i> | <i>B. cereus</i> | <i>S. typhimurium</i> | <i>E. coli</i> | <i>S. flexineri</i> | <i>V. cholera</i> | <i>V. parahemolyticus</i> |
| 1            | Milk      | A,B, C, D | 65                       | 16                         | 5                | 2                     | 0              | 0                   | 0                 | 0                         |
| 2            | Curd      | A, D, E   | 4                        | 2                          | 3                | 0                     | 0              | 0                   | 0                 | 0                         |
| 3            | Ice cream | A,G       | 8                        | 1                          | 2                | 0                     | 0              | 0                   | 0                 | 0                         |
| 4            | Ghee      | A,B       | 5                        | 1                          | 1                | 0                     | 0              | 0                   | 0                 | 0                         |
| 5            | Paneer    | A,C, D    | 5                        | 3                          | 0                | 2                     | 0              | 0                   | 0                 | 0                         |
| <b>Total</b> |           |           | <b>87</b>                | <b>23</b>                  | <b>11</b>        | <b>4</b>              | <b>0</b>       | <b>0</b>            | <b>0</b>          | <b>0</b>                  |

**Supplementary Table S4.** Different bakery samples, locations and specific pathogen isolation.

| Sl. No       | Samples          | Location | No. of samples collected | Observation                |                  |                       |                |                     |                   |                           |
|--------------|------------------|----------|--------------------------|----------------------------|------------------|-----------------------|----------------|---------------------|-------------------|---------------------------|
|              |                  |          |                          | <i>Staphylococcal spp.</i> | <i>B. cereus</i> | <i>S. typhimurium</i> | <i>E. coli</i> | <i>S. flexineri</i> | <i>V. cholera</i> | <i>V. parahemolyticus</i> |
| 1            | Cake             | A,B      | 6                        | 2                          | 1                | 0                     | 1              | 0                   | 0                 | 0                         |
| 2            | Mysore pak       | A,B, D   | 6                        | 1                          | 1                | 0                     | 1              | 0                   | 0                 | 0                         |
| 3            | Bread            | A,B      | 7                        | 2                          | 2                | 0                     | 0              | 0                   | 0                 | 0                         |
| 4            | Rusk             | A,B      | 8                        | 0                          | 2                | 0                     | 2              | 0                   | 0                 | 0                         |
| 5            | Jamun            | A, B, C  | 3                        | 0                          | 0                | 0                     | 1              | 0                   | 0                 | 0                         |
| 6            | Rasgulla         | A,D      | 8                        | 0                          | 0                | 0                     | 0              | 0                   | 0                 | 0                         |
| 7            | Chips            | A,B      | 16                       | 3                          | 4                | 0                     | 4              | 0                   | 0                 | 0                         |
| 8            | Fried ground nut | A,D      | 4                        | 4                          | 3                | 0                     | 2              | 0                   | 2                 | 0                         |
| 9            | Fried dhal       | A, C, E  | 5                        | 2                          | 2                | 0                     | 2              | 0                   | 1                 | 0                         |
| 10           | Saunpapdi        | A, B, E  | 8                        | 0                          | 0                | 0                     | 1              | 0                   | 0                 | 0                         |
| 11           | Biscuit          | A        | 1                        | 0                          | 0                | 0                     | 0              | 0                   | 0                 | 0                         |
| <b>Total</b> |                  |          | <b>72</b>                | <b>14</b>                  | <b>15</b>        | <b>0</b>              | <b>14</b>      | <b>0</b>            | <b>3</b>          | <b>0</b>                  |

**Supplementary Table S5.** Different processed samples, locations and specific pathogen isolation.

| Sl. No       | Samples    | Location | No. of samples collected | Observation                |                  |                       |                |                     |                   |                           |
|--------------|------------|----------|--------------------------|----------------------------|------------------|-----------------------|----------------|---------------------|-------------------|---------------------------|
|              |            |          |                          | <i>Staphylococcal spp.</i> | <i>B. cereus</i> | <i>S. typhimurium</i> | <i>E. coli</i> | <i>S. flexineri</i> | <i>V. cholera</i> | <i>V. parahemolyticus</i> |
| 1            | Color rice | A, D, E  | 34                       | 14                         | 10               | 1                     | 3              | 0                   | 0                 | 0                         |
| 2            | Idly       | A, D     | 43                       | 12                         | 3                | 0                     | 1              | 0                   | 0                 | 0                         |
| 3            | Chapathi   | A, B     | 8                        | 9                          | 2                | 2                     | 2              | 0                   | 0                 | 0                         |
| 4            | Chicken    | C, D, E  | 16                       | 12                         | 8                | 9                     | 3              | 1                   | 0                 | 0                         |
| 5            | Mutton     | A, B     | 5                        | 3                          | 5                | 1                     | 2              | 0                   | 0                 | 2                         |
| 6            | Kabab      | A,A      | 15                       | 13                         | 9                | 8                     | 1              | 2                   | 3                 | 0                         |
| 7            | Paulav     | A        | 3                        | 0                          | 1                | 2                     | 1              | 0                   | 0                 | 0                         |
| 8            | Sambar     | A        | 4                        | 1                          | 1                | 2                     | 2              | 0                   | 0                 | 0                         |
| 9            | Vada       | A,C      | 5                        | 1                          | 1                | 1                     | 1              | 0                   | 0                 | 0                         |
| 10           | Egg        | A,B      | 2                        | 1                          | 0                | 0                     | 0              | 0                   | 0                 | 0                         |
| <b>Total</b> |            |          | <b>135</b>               | <b>66</b>                  | <b>40</b>        | <b>26</b>             | <b>16</b>      | <b>3</b>            | <b>3</b>          | <b>2</b>                  |

A: Devaraj Urs market, Mysore, B: T. K. Layout, Mysore, C: K. D. Road, Mysore, D: Bamboo bazaar, Mysore, and E: Nanjanagud.

**Supplementary Table S6.** MDR *Staphylococcal* species associated with different food items.

| <b>Food items</b>     | <b>Areas/Source</b> | <b><i>S. aureus</i></b> | <b><i>S. epidermidis</i></b> | <b><i>S. haemolyticus</i></b> |
|-----------------------|---------------------|-------------------------|------------------------------|-------------------------------|
| Vegetarian            | Hospital            | 22                      | 4                            | 1                             |
|                       | Street vended       | 54                      | 1                            | 0                             |
|                       | Bakery              | 14                      | 0                            | 0                             |
| Non-vegetarian        | Market              | 30                      | 1                            | 2                             |
|                       | Street vended       | 12                      | 1                            | 1                             |
|                       | Packed              | 6                       | 1                            | 0                             |
| Dairy                 | Milk                | 12                      | 0                            | 0                             |
|                       | Milk products       | 11                      | 1                            | 0                             |
| Vegetables and fruits | Market              | 27                      | 0                            | 0                             |
|                       | City                | 8                       | 0                            | 0                             |

**Supplementary Table S7.** Different pathogens and confirmed at species level.

| Sl. No. | Microorganisms                | Standard | Isolated isolates |           | % of incidence | Specific genes |                     |             |            |            |                            |             |             |   |
|---------|-------------------------------|----------|-------------------|-----------|----------------|----------------|---------------------|-------------|------------|------------|----------------------------|-------------|-------------|---|
|         |                               |          | Total             | Confirmed |                | <i>Eap</i>     | <i>Emitic toxin</i> | <i>phoP</i> | <i>stx</i> | <i>mpl</i> | <i>Scaffolding protein</i> | <i>ompW</i> | <i>toxR</i> |   |
| 1       | <i>Staphylococcus aureus</i>  | 1        | 160               | 152       | 94.37          | +              | -                   | -           | -          | -          | -                          | -           | -           |   |
| 2       | <i>Bacillus cereus</i>        | 1        | 108               | 97        | 89.81          | -              | +                   | -           | -          | -          | -                          | -           | -           |   |
| 3       | <i>Salmonella typhimurium</i> | 1        | 85                | 60        | 70.58          | -              | -                   | +           | -          | -          | -                          | -           | -           |   |
| 4       | <i>Escherichia coli</i>       | 1        | 92                | 78        | 84.78          | -              | -                   | -           | +          | -          | -                          | -           | -           |   |
| 5       | <i>Shigella flexneri</i>      | 1        | 29                | 20        | 68.96          | -              | -                   | -           | -          | -          | +                          | -           | -           |   |
| 6       | <i>Vibrio cholera</i>         | 1        | 20                | 8         | 40.00          | -              | -                   | -           | -          | -          | -                          | +           | -           |   |
| 7       | <i>Vibrio parahemolyticus</i> | 1        | 8                 | 2         | 25.00          | -              | -                   | -           | -          | -          | -                          | -           | +           |   |
| 8       | <i>Pseudomonas aeruginosa</i> | 1        |                   |           |                | -              | -                   | -           | -          | -          | -                          | -           | -           |   |
| 9       | <i>Bacillus subtilis</i>      | 1        |                   |           |                | -              | -                   | -           | -          | -          | -                          | -           | -           | - |
| 10      | <i>Enterobacter aerogenes</i> | 1        |                   |           |                | -              | -                   | -           | -          | -          | -                          | -           | -           | - |



**Supplementary Table S8:** Biochemical characterization of food-borne *Staphylococcal* isolates.

| Biochemical tests <sup>a</sup> | Results |    |    |
|--------------------------------|---------|----|----|
|                                | Sa      | Se | Sh |
| Gram's reaction                | +       | +  | +  |
| Catalase test                  | +       | +  | +  |
| Kovac's oxidase                | -       | -  | -  |
| KOH solubility                 | +       | +  | +  |
| Starch hydrolysis              | +       | -  | -  |
| Gelatin hydrolysis             | +       | w  | w  |
| Coagulase                      | +       | -  | -  |
| Lipase                         | +       | -  | +  |
| DNase                          | +       | -  | -  |
| Pigment                        | +       | -  | -  |

Sa: *S. aureus*, Se: *S. epidermidis* and Sh: *S. haemolyticus*. <sup>a</sup>All the test results are performed in five replicates and were repeated thrice. '+' indicates positive reaction, '-' indicates negative reaction and 'w' indicates weak reaction.

**Supplementary Table S9:** DNA sequence results of pathogens involved in this study.

| <b>Sl. No.</b> | <b>Pathogen</b>            | <b>Strain</b> | <b>Gene</b>     | <b>GenBank Accession no</b> |
|----------------|----------------------------|---------------|-----------------|-----------------------------|
| 1              | <i>S. aureus</i>           | UOM012        | <i>16S rRNA</i> | KX641603                    |
| 2              | <i>S. aureus</i>           | UOM018        | <i>16S rRNA</i> | KX431901                    |
| 3              | <i>S. aureus</i>           | UOM048        | <i>16S rRNA</i> | KX431902                    |
| 4              | <i>S. aureus</i>           | UOM051        | <i>16S rRNA</i> | KX431903                    |
| 5              | <i>S. aureus</i>           | UOM069        | <i>16S rRNA</i> | KX641604                    |
| 6              | <i>S. aureus</i>           | UOM082        | <i>16S rRNA</i> | KX431904                    |
| 7              | <i>S. aureus</i>           | UOM090        | <i>16S rRNA</i> | KX355577                    |
| 8              | <i>S. aureus</i>           | UOM114        | <i>16S rRNA</i> | KX431905                    |
| 9              | <i>S. aureus</i>           | UOM136        | <i>16S rRNA</i> | KX641605                    |
| 10             | <i>S. aureus</i>           | UOM157        | <i>16S rRNA</i> | KX431906                    |
| 11             | <i>S. aureus</i>           | UOM160        | <i>16S rRNA</i> | KX431907                    |
| 12             | <i>S. aureus</i>           | UOM090        | <i>mecA</i>     | KX371863                    |
| 13             | <i>S. epidermidis</i>      | UOM036        | <i>16S rRNA</i> | KX371861                    |
| 14             | <i>S. epidermidis</i>      | UOM057        | <i>16S rRNA</i> | KX431908                    |
| 15             | <i>S. epidermidis</i>      | UOM080        | <i>16S rRNA</i> | KX641606                    |
| 16             | <i>S. epidermidis</i>      | UOM097        | <i>16S rRNA</i> | KX431909                    |
| 17             | <i>S. epidermidis</i>      | UOM036        | <i>mecA</i>     | KX387571                    |
| 18             | <i>S. haemolyticus</i>     | UOM142        | <i>16S rRNA</i> | KX371862                    |
| 19             | <i>S. haemolyticus</i>     | UOM150        | <i>16S rRNA</i> | KX431910                    |
| 20             | <i>S. haemolyticus</i>     | UOM142        | <i>mecA</i>     | KX387572                    |
| 21             | <i>V. cholera</i>          | UOM210        | <i>16S rRNA</i> | KX452112                    |
| 22             | <i>V. parahaemolyticus</i> | UOM300        | <i>16S rRNA</i> | KX452113                    |
| 23             | <i>E. coli</i>             | UOM352        | <i>16S rRNA</i> | KX452114                    |
| 24             | <i>S. flexneri</i>         | UOM398        | <i>16S rRNA</i> | KX452115                    |
| 25             | <i>S. typhimurium</i>      | UOM400        | <i>16S rRNA</i> | KX452116                    |
| 26             | <i>E. aerogenes</i>        | UOM447        | <i>16S rRNA</i> | KX452117                    |
| 27             | <i>B. cereus</i>           | UOM380        | <i>16S rRNA</i> | KX641607                    |
| 28             | <i>P. aeruginosa</i>       | UOM219        | <i>16S rRNA</i> | KX641608                    |

**Supplementary Table S10:** Comparison of methods involved in pathogen identification.

|                                                    | <b>Standard culture</b>                                  | <b>PCR</b>                                      | <b>Sequencing</b>                        | <b>PCR-SSCP</b>                   | <b>MALDI-Biotyper</b>                                                             |
|----------------------------------------------------|----------------------------------------------------------|-------------------------------------------------|------------------------------------------|-----------------------------------|-----------------------------------------------------------------------------------|
| <b>Assay time (sample processing to detection)</b> | 2-7 days                                                 | > 3 hr                                          | Within a day                             | < 5 hr                            | < 10-30 min                                                                       |
| <b>Instrument</b>                                  | Incubator, Biosafety Laminar hood<br>Rs. 50,000-2,00,000 | Standard PCR machine<br>Rs. 3,00,000 – 4,00,000 | Automated sequencer<br>Rs. 7,00,000      | Electrophoresis unit<br>Rs.25,000 | Bruker Daltonics MALDI-TOF-MS<br>~Rs. 1,20,00,000                                 |
| <b>Cost (per assay)</b>                            | ~ Rs. 50 (media, plates, chemicals)                      | ~ Rs. 60 (polymerases, dyes, primers, agarose)  | ~ Rs. 500 (PCR, purification, chemicals) | ~ Rs. 90 (chemicals)              | ~ Rs. 2,500 (chemicals and instrumentation)                                       |
| <b>POC use</b>                                     | Difficult to apply                                       | Easily applicable                               | Difficult to use                         | Easily applicable in the future   | Might be applicable in the future, currently using in facilitated diagnostic labs |
| <b>Care</b>                                        | Given at highest priority                                | Maintain hygiene                                | Maintain hygiene                         | Care should be taken              | Work with sterile condition                                                       |
| <b>Sensitivity</b>                                 | >80-85%                                                  | >90-94%                                         | >90-96%                                  | >95-97% %                         | >99%                                                                              |

**Supplementary Table S11:** Reference identification of pathogenic isolates obtained by MALDI-Biotyper and biochemical assays.

| <b>Sl.No.</b> | <b>Original biochemical identification</b> | <b>Biotyper ID (score)</b>        | <b>Repeated biochemical identification</b> | <b>16S rDNA identification</b> |
|---------------|--------------------------------------------|-----------------------------------|--------------------------------------------|--------------------------------|
| <i>1</i>      | <i>S. aureus</i>                           | <i>S. aureus</i> (2.28)           | <i>S. aureus</i>                           | <i>S. aureus</i>               |
| <i>2</i>      | <i>S. epidermidis</i>                      | <i>S. epidermidis</i> (2.10)      | <i>S. epidermidis</i>                      | <i>S. epidermidis</i>          |
| <i>3</i>      | <i>S. haemolyticus</i>                     | <i>S. haemolyticus</i> (2.01)     | <i>S. haemolyticus</i>                     | <i>S. haemolyticus</i>         |
| <i>4</i>      | <i>S. typhimurium</i>                      | <i>S. typhimurium</i> (2.18)      | <i>S. typhimurium</i>                      | <i>S. typhimurium</i>          |
| <i>5</i>      | <i>S. flexneri</i>                         | <i>S. flexneri</i> (2.03)         | <i>S. flexneri</i>                         | <i>S. flexneri</i>             |
| <i>6</i>      | <i>E. coli</i>                             | <i>E. coli</i> (2.32)             | <i>E. coli</i>                             | <i>E. coli</i>                 |
| <i>7</i>      | <i>B. cereus</i>                           | <i>B. cereus</i> (2.00)           | <i>B. cereus</i>                           | <i>B. cereus</i>               |
| <i>8</i>      | <i>P. aeruginosa</i>                       | <i>P. aeruginosa</i> (2.10)       | <i>P. aeruginosa</i>                       | <i>P. aeruginosa</i>           |
| <i>9</i>      | <i>V. cholera</i>                          | <i>V. cholera</i> (2.01)          | <i>V. cholera</i>                          | <i>V. cholera</i>              |
| <i>10</i>     | <i>V. parahaemolyticus</i>                 | <i>V. parahaemolyticus</i> (2.00) | <i>V. parahaemolyticus</i>                 | <i>V. parahaemolyticus</i>     |
| <i>11</i>     | <i>E. coli</i>                             | <i>E. aerogenes</i> (2.44)        | <i>E. coli</i>                             | <i>E. aerogenes</i>            |

**Supplementary Table S12:** Molecular mechanism of antibacterial resistance identified in CoPS.

| Original biochemical test identification |        | Phenotype                                                  | Resistant gene | Food source                               |
|------------------------------------------|--------|------------------------------------------------------------|----------------|-------------------------------------------|
| <i>S. aureus</i>                         | UOM012 | AMP, AMC, CTX, OX, P, COT, TE                              | <i>mecA</i>    | Tomato, Onion, Brinjal                    |
| <i>S. aureus</i>                         | UOM018 | LZ, CIP, K, OX, P, C, CFM, B                               | <i>mecA</i>    | Vada, Paulav                              |
| <i>S. aureus</i>                         | UOM048 | AZM, B, CFM, E, OX, P, RIF, S                              | <i>mecA</i>    | Colour rice,                              |
| <i>S. aureus</i>                         | UOM051 | TE, NIT, K, TE, AZM                                        | <i>mecA</i>    | Chips,                                    |
| <i>S. aureus</i>                         | UOM069 | E, AMC                                                     | <i>mecA</i>    | Chips, Milk                               |
| <i>S. aureus</i>                         | UOM082 | S, TE, NIT, AMP, K, TOB, OX, P, CIP, C, AMC, AZM, B, CFM   | <i>mecA</i>    | Fish kabab, Chicken                       |
| <i>S. aureus</i>                         | UOM090 | CD, NIT, K, TE, AZM, B, NX, CTX, P, OX, RIF, S, C, TOB     | <i>mecA</i>    | Idli, Vada, Paulav, Mutton, Chicken       |
| <i>S. aureus</i>                         | UOM114 | NIT, AMP, TOB, RIF, COT, OX, P, C, CFM, B                  | <i>mecA</i>    |                                           |
| <i>S. aureus</i>                         | UOM136 | TOB, RIF, COT, AMP, B, K, OX, P                            | <i>mecA</i>    | Apple, Bread                              |
| <i>S. aureus</i>                         | UOM157 | TOB, CD, CFM                                               | <i>mecA</i>    | Colour rice, Paulav, Vada                 |
| <i>S. aureus</i>                         | UOM160 | TE, OX, P, AMC                                             | -              | Grapes, Apple                             |
| <i>S. epidermidis</i>                    | UOM036 | S, TE, B, CFM, OX, K, P, RIF, S, AMC, CTX                  | <i>mecA</i>    | White rice (Street vender)                |
| <i>S. epidermidis</i>                    | UOM057 | S, TE, NIT, K, AMP, TOB, OX, COT, CIP, C, AMC, AZM, B, CFM | <i>mecA</i>    | Soya milk<br>Idli                         |
| <i>S. epidermidis</i>                    | UOM080 | NIT, AMP, TOB, CFM, E, OX, S, TE                           | <i>mecA</i>    |                                           |
| <i>S. epidermidis</i>                    | UOM097 | TE, AZM, RIF, COT, AMP, B, CFM                             | <i>mecA</i>    | Carrot, Beet root                         |
| <i>S. haemolyticus</i>                   | UOM142 | NIT, TE, AZM, K, B, CFM, CTX, AMP, TOB, CFM, E, OX         | <i>mecA</i>    | Pork, Fish, Mutton<br>Chicken, Crab, Idli |
| <i>S. haemolyticus</i>                   | UOM150 | TOB, COT, C, K, NIT, TE, AZM, E, AMC, OX, P                | <i>mecA</i>    | Idli, Tomato                              |

Abbreviations: AMP- ampicillin, AZM-azithromycin, AMC- amoxyclov, B- bacitracin, CFM- cefoxitin, CTX- cefotaxime, C- chloramphenicol, CIP- ciprofloxacin, CD- clindamycin, COT- co-Trimoxazole, E- erythromycin, GEN- gentamycin, K- kanamycin, LZ- linezolid, NIT- nitrofurantoin, NX- norfloxacin, OX- oxacillin, P- penicillin, RIF- rifampicin, S- streptomycin, TE- tetracycline, and TOB- tobramycin.

**Supplementary Table S13:** Proposed resistance genes conferred in our *Staphylococcal* species.

| Drugs                                                | Gene conferring resistance           | Description                                                                                                                                                                                                                                           |
|------------------------------------------------------|--------------------------------------|-------------------------------------------------------------------------------------------------------------------------------------------------------------------------------------------------------------------------------------------------------|
| <b>Amoxyclav</b>                                     | <i>amc</i>                           | Inhibiting bacterial cell wall synthesis                                                                                                                                                                                                              |
| <b>Amphicillin</b>                                   | <i>amr</i>                           | Inhibits the third and last stage of bacterial cell wall synthesis by binding to PBPs. Cell lysis is then mediated by bacterial cell wall autolytic enzymes such as autolysins; it is possible that Ampicillin interferes with an autolysin inhibitor |
| <b>Azithromycin</b>                                  | <i>ermC</i>                          | Binds to the 23S rRNA of 50S subunit of the 70S bacterial ribosomes, and therefore inhibits RNA-dependent protein synthesis in bacterial cells                                                                                                        |
| <b>Bacitracin</b>                                    | <i>baca</i>                          | Undecaprenyl pyrophosphate phosphatase, which consists in the sequestration of Undecaprenyl pyrophosphate                                                                                                                                             |
| <b>Cefotaxime</b>                                    | <i>mecA</i>                          | Inhibition of cell wall synthesis via affinity for penicillin-binding proteins (PBPs). Cefotaxime shows high affinity for penicillin-binding proteins in the cell wall including PBP Ib and PBP III                                                   |
| <b>Cefoxitime</b>                                    | <i>mecA</i>                          | Inhibition of cell wall synthesis                                                                                                                                                                                                                     |
| <b>Chloramphenicol</b>                               | <i>cml_e4</i>                        | Major facilitator superfamily transporter, chloramphenicol efflux pump                                                                                                                                                                                |
| <b>Ciprofloxacin</b>                                 | <i>norA</i>                          | Inhibition of the enzymes topoisomerase II (DNA gyrase) and topoisomerase IV, which are required for bacterial DNA replication, transcription, repair, strand supercoiling repair, and recombination.                                                 |
| <b>Clindamycin</b><br><b>Clindamycin (inducible)</b> | <i>VGA(A)LC</i><br><i>ermA/ermB,</i> | Bind to the 23S portion of the 50S subunit of bacterial ribosomes and inhibit early elongation of peptide chain by inhibiting transpeptidase reaction                                                                                                 |
| <b>Co-Trimoxazole</b>                                | <i>dhfr</i>                          | Inhibits bacterial synthesis of dihydrofolic acid and inhibiting the enzyme dihydrofolate reductase by competing with PABA. This combination blocks 2 consecutive steps in bacterial biosynthesis of essential nucleic acids and proteins             |
| <b>Erythromycin</b>                                  | <i>msrA</i><br><i>ermC/ermT</i>      | Inhibits protein synthesis by reversibly binding to 50S ribosomal subunits of ribosomenear the ‘P’ site to stop the translation. Effective against actively dividing organisms.                                                                       |
| <b>Gentamicin</b>                                    | <i>aacA-aphD</i>                     | Works by irreversibly binding the 30S subunit of the bacterial ribosome, interrupting protein                                                                                                                                                         |

|                       |                          |                                                                                                                                                                                                                                      |
|-----------------------|--------------------------|--------------------------------------------------------------------------------------------------------------------------------------------------------------------------------------------------------------------------------------|
| <b>Kanamycin</b>      | <i>aacA-aphD</i>         | synthesis similar to Kanamycin<br>Binds irreversibly to the bacterial 30S ribosomal subunit protein and 16S rRNA and prevents the formation of the initiation complex with messenger RNA intern inhibits bacterial protein synthesis |
| <b>Linezolid</b>      | <i>Cfr</i>               | Bacteriostatic action, which stops bacteria from reproducing                                                                                                                                                                         |
| <b>Methicillin</b>    | <i>mecA</i>              | Penicillin binding protein, which has a low affinity for beta-lactams and catalyze a penicillin-insensitive transpeptidation                                                                                                         |
| <b>Nitrofurantoin</b> |                          | Damage bacterial DNA                                                                                                                                                                                                                 |
| <b>Norfloxacin</b>    | <i>nfxC</i>              | Extrusion of norfloxacin                                                                                                                                                                                                             |
| <b>Oxacillin</b>      | <i>mecA</i>              | Binding to specific penicillin-binding proteins (PBPs) located inside the bacterial cell wall. Inhibits the third and last stage of bacterial cell wall synthesis                                                                    |
| <b>Pennicillin G</b>  | <i>blaZ/ bl2a_pc</i>     | Class A beta-lactamase. This enzyme breaks the beta-lactam antibiotic ring open and deactivates the molecule's antibacterial properties                                                                                              |
| <b>Rifampicin</b>     | <i>Rif</i>               | RNA polymerase with reduced affinity                                                                                                                                                                                                 |
| <b>Streptomycin</b>   | <i>Str</i>               | Streptomycin resistance protein                                                                                                                                                                                                      |
| <b>Tetracycline</b>   | <i>tetK/tetL/tetM</i>    | Major facilitator superfamily transporter, tetracycline efflux pump                                                                                                                                                                  |
| <b>Tobramycin</b>     | <i>aac6ie/ aacA-aphD</i> | Aminoglycoside N-acetyltransferase, which modifies aminoglycosides by acetylation.                                                                                                                                                   |
